# Supplementary material for: A multifunctional molecular entity CuII–SnIV heterobimetallic complex as a potential cancer chemotherapeutic agent: DNA binding/cleavage, SOD mimetic, topoisomerase Iα inhibitory and in vitro cytotoxic activities
Source: Royal Society of Chemistry journal article supplement (doi:10.1039/c5ra07333b), 2015-01-01
Supplement: c5ra07333b1.pdf [file c5ra07333b1.pdf]

## Supplementary data

### A multifunctional molecular entity Cu<sup>II</sup>-Sn<sup>IV</sup> heterobimetallic complex as potential cancer chemotherapeutic agents: DNA binding/cleavage, SOD mimetic, topoisomerase I $\alpha$ inhibitory and in vitro cytotoxic activities

Sartaj Tabassum,<sup>a\*</sup> Ahmad Asim,<sup>a</sup> Rais Ahmad Khan,<sup>a,b</sup> Farukh Arjmand,<sup>a</sup> Rajakumar Divya,<sup>c</sup> Perumalsamy Balaji,<sup>c</sup> and Mohammad Abdulkader Akbarsha.<sup>d</sup>

<sup>a\*</sup>Department of Chemistry, Aligarh Muslim University, Aligarh-202002, India.

Email: [tsartaj62@yahoo.com](mailto:tsartaj62@yahoo.com)

<sup>b</sup>Department of Chemistry, King Saud University, Riyadh, 11451, KSA.

<sup>c</sup>Department of Biomedical Science, Bharathidasan University, Tiruchirappalli 620 024, India.

<sup>d</sup>Mahatma Gandhi-Doerenkamp Center (MGDC) for Alternatives to Use of Animals in Life Science Education, Bharathidasan University, Tiruchirappalli - 620 024, India.

### Figures.

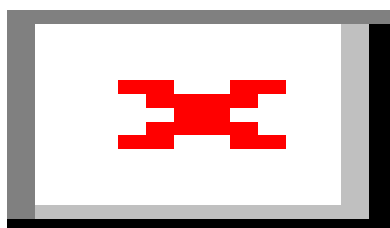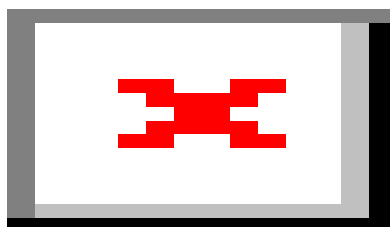

**Figure S1.** EPR spectra of complex 1 and 3 in DMSO at LNT

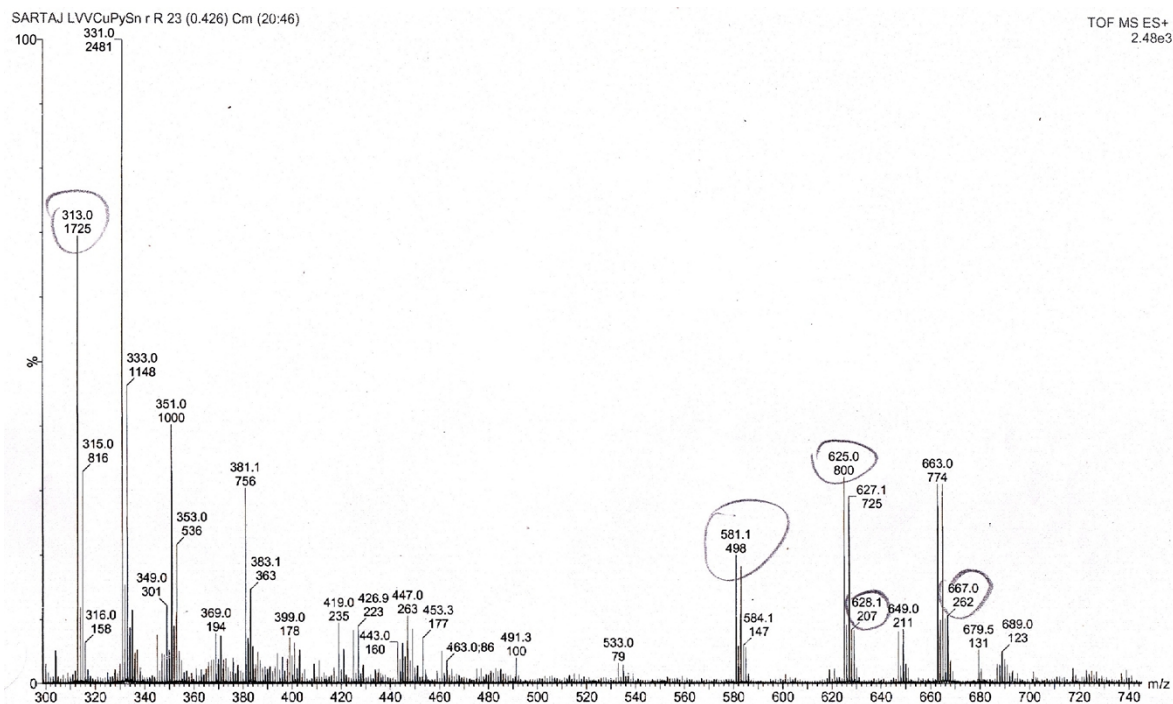

**Fig. S2.** ESI MS spectrum for complex 3.

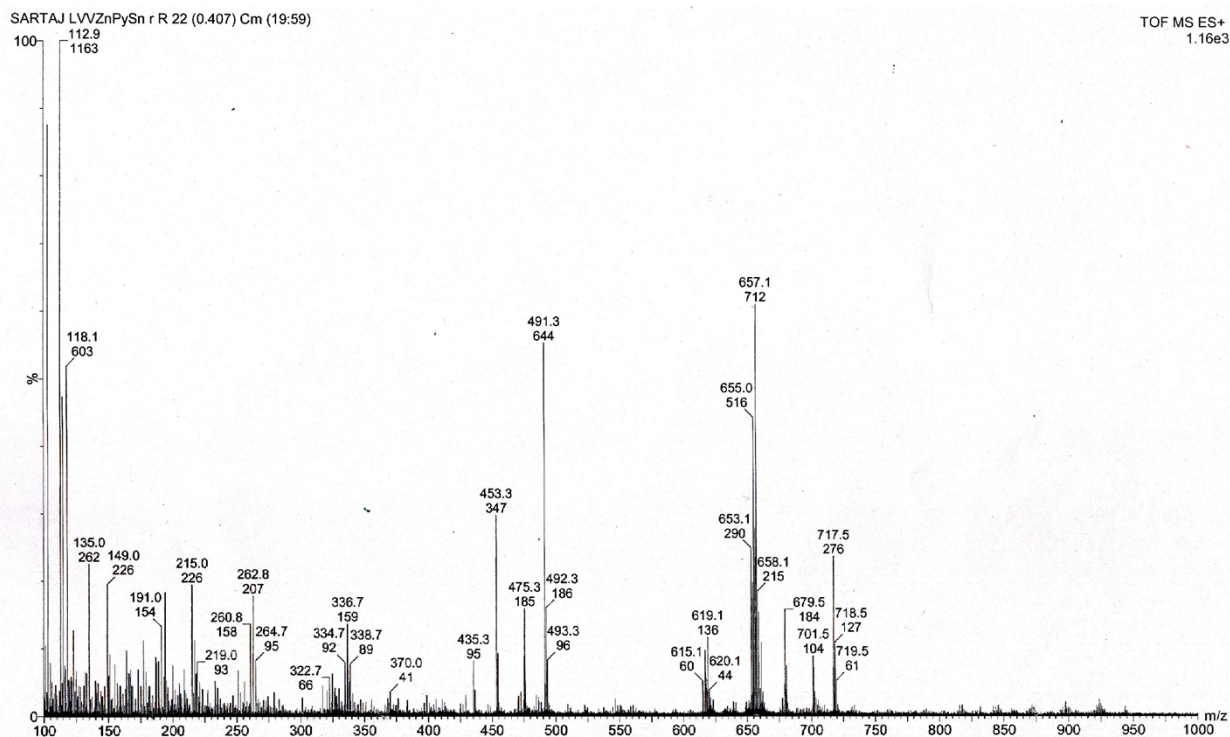

**Fig. S3.** ESI MS spectrum for complex 4.

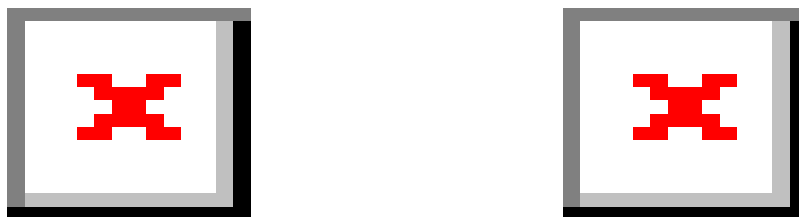

**Fig. S4.** Absorption spectral traces of (A) complex **1** (B) complex **2** in 5% DMSO/ 5mM Tris HCl-50 mM NaCl buffer at pH 7.2 upon addition of CT DNA.

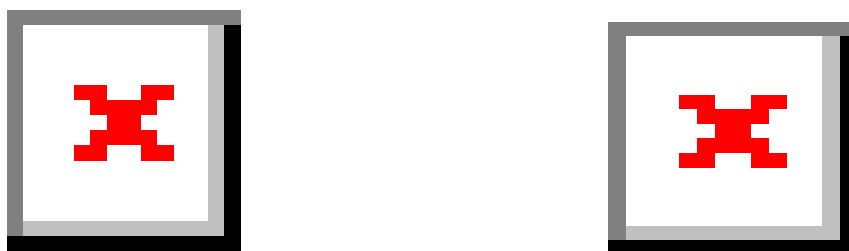

**Fig. S5.** Emission spectra of (A) complex **1** (B) complex **2** in the presence of DNA in 5 mM Tris-HCl/50mM NaCl buffer. Arrows show the intensity changes upon increasing concentration of the DNA.

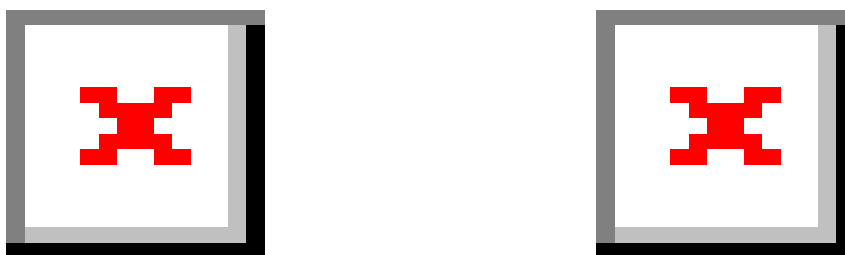

**Fig. S6.** Emission spectra of EB bound to DNA in the absence and presence of (A) complex **1** and (B) complex **2** in 5 mM Tris-HCl/50 mM NaCl buffer. Arrows show the intensity changes upon increasing concentration of the complexes.
